# Supplementary material
Source: Springer Nature journal article supplement (https://www.springermedizin.de/resource/supplementary/12887_2010_383_MOESM2_ESM.pdf/9474984)

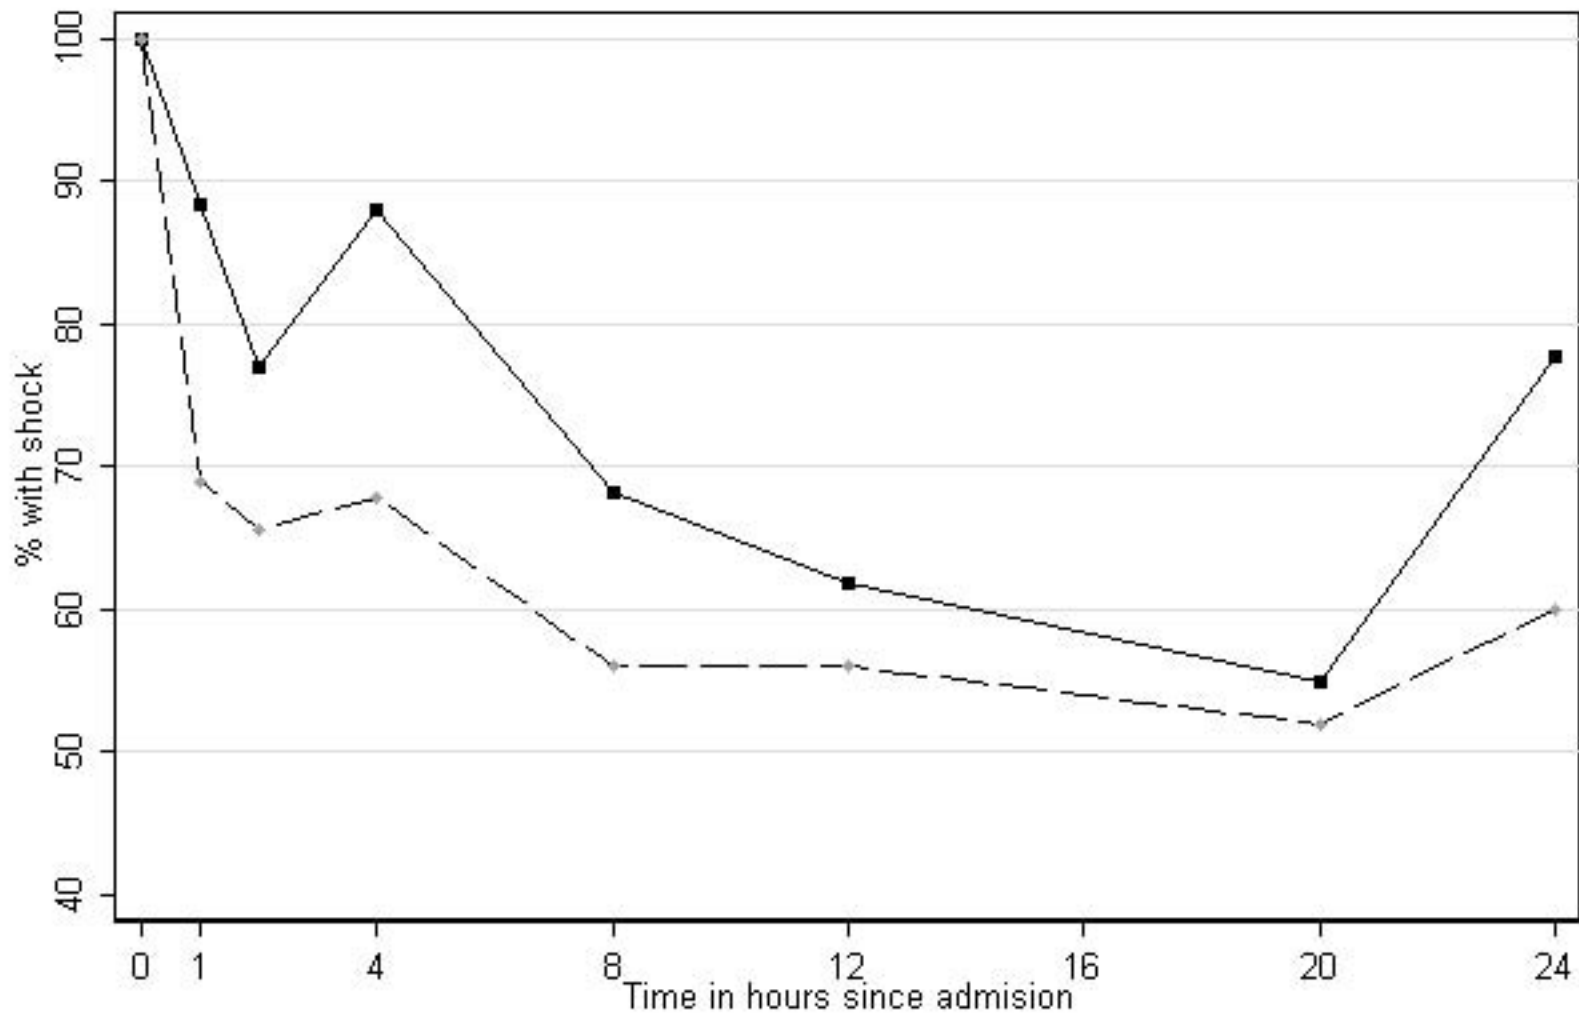

—■— HSD/5D    -◆- Ringer's Lactate

Supplement: MOESM2 [file 9474984]
